# Supplementary material for: Facile hydrothermal synthesis of antibacterial multi-layered hydroxyapatite nanostructures with superior flexibility
Source: Royal Society of Chemistry journal article supplement (doi:10.1039/c7ce01938f), 2018-01-01
Supplement: c7ce01938f2.pdf [file c7ce01938f2.pdf]

## Supporting Information

### **Facile hydrothermal synthesis of antibacterial multi-layered hydroxyapatite nanostructures with superior flexibility**

*Mei-li Qi,<sup>a,b,c</sup> Zhen-nan Huang,<sup>c</sup> Abhijit Phakatkar,<sup>d</sup> Wen-tao Yao,<sup>e</sup> Yi-fei Yuan,<sup>c</sup> Tara Foroozan,<sup>c</sup> Gui-yong Xiao,<sup>a,b</sup> Reza Shahbazian-Yassar,<sup>c</sup> Yu-peng Lu,<sup>a,b\*</sup> and Tolou Shokuhfar<sup>d</sup>*

<sup>a</sup> Key Laboratory for Liquid-Solid Structural Evolution and Processing of Materials, Ministry of Education, Shandong University, Ji'nan 250061, China;

<sup>b</sup> School of Materials Science and Engineering, Shandong University, Ji'nan 250061, China;

<sup>c</sup> Department of Mechanical and Industrial Engineering, University of Illinois at Chicago, Chicago, Illinois 60607, United States;

<sup>d</sup> Department of Bioengineering, University of Illinois at Chicago, Chicago, Illinois 60607, United States;

<sup>e</sup> Department of Mechanical Engineering–Engineering Mechanics, Michigan Technological University, Houghton, Michigan 49931, United States;

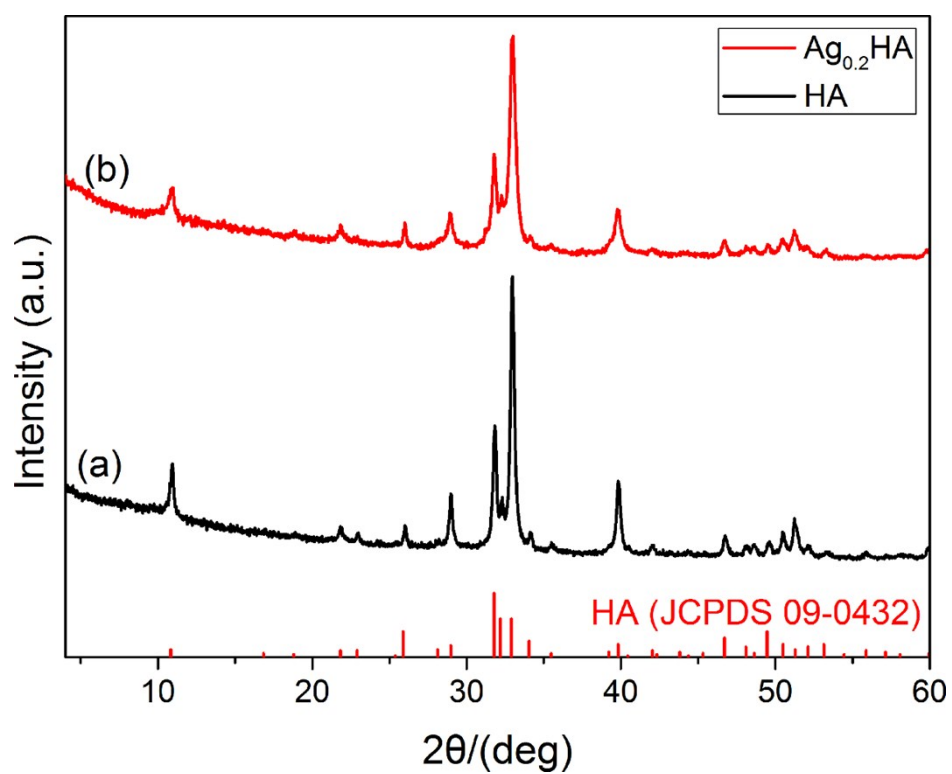

Figure S1. XRD patterns of the samples hydrothermally treated at  $160^\circ\text{C}$  for 6 h. (a) HA, and (b)  $\text{Ag}_{0.2}\text{HA}$ .
